# Supplementary material for: Combination of Betulinic Acid Fragments and Carbonic Anhydrase Inhibitors—A New Drug Targeting Approach
Source: MDPI journal article supplement (doi:10.3390/pharmaceutics16030401), 2024-03-14

## Supplementary Materials

# Combination of Betulinic Acid Fragments and Carbonic Anhydrase Inhibitors – A New Drug Targeting Approach

Matthias Bache <sup>1,\*</sup>, Niels V. Heise <sup>2</sup>, Andreas Thiel <sup>3</sup>, Anne Funtan <sup>4</sup>, Franziska Seifert <sup>4</sup>, Marina Petrenko <sup>1</sup>,

Antje Güttler <sup>1</sup>, Sarah Brandt <sup>5</sup>, Thomas Mueller <sup>5</sup>, Dirk Vordermark <sup>1</sup>, Iris Thondorf <sup>3</sup>, René Csuk <sup>2</sup> and Reinhard Paschke <sup>4</sup>

<sup>1</sup> Department of Radiotherapy, Martin-Luther-University Halle-Wittenberg, Halle (Saale),

<sup>2</sup> Institute of Chemistry, Martin-Luther-University Halle-Wittenberg, Halle (Saale).

<sup>3</sup> Institute of Biochemistry and Biotechnology, Martin-Luther-University Halle-Wittenberg, Halle (Saale),

<sup>4</sup> BioCenter, Martin-Luther-University Halle-Wittenberg, Halle (Saale),

<sup>5</sup> Department of Internal Medicine IV (Hematology/Oncology), Martin-Luther-University Halle-Wittenberg, Halle (Saale).

\* Correspondence: matthias.bache@uk-halle.de; Tel.: +495557424

Figure S1: Representative <sup>1</sup>H- and <sup>13</sup>C- NMR spectra and ESI-MS spectra of the compounds synthesized in this work

### Compound 3

<sup>1</sup>H NMR (CDCl<sub>3</sub>, 400 MHz)

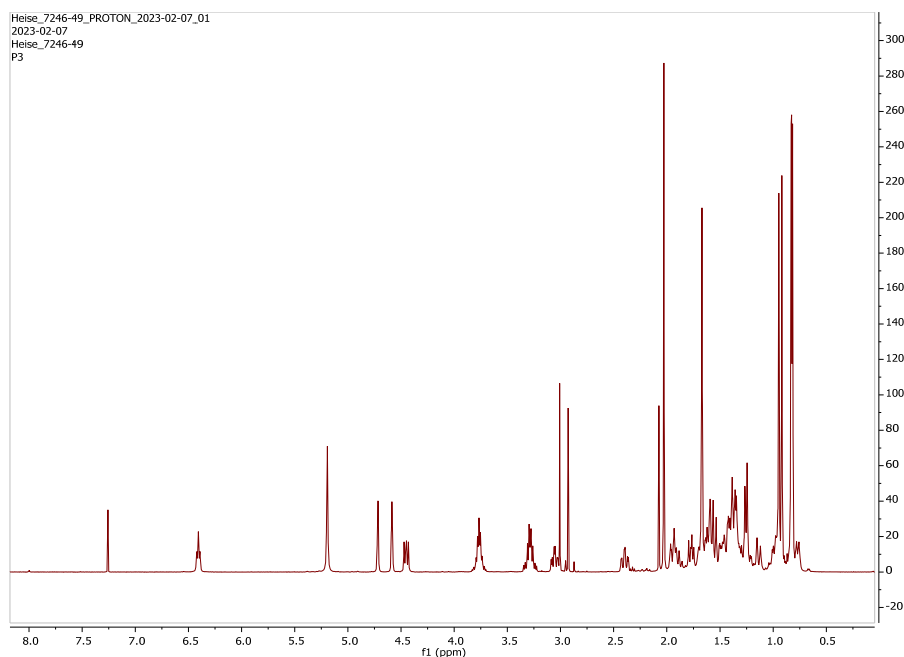

<sup>13</sup>C NMR (CDCl<sub>3</sub>, 101 MHz)

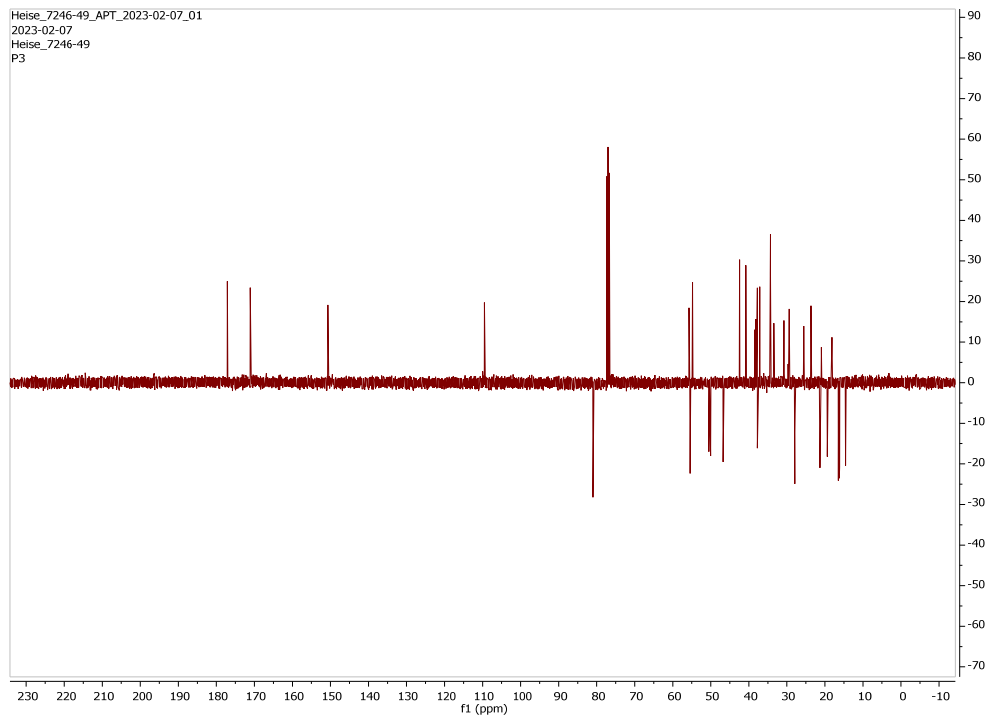

## Compound **4**

$^1\text{H}$  NMR ( $\text{CDCl}_3$ , 500 MHz)

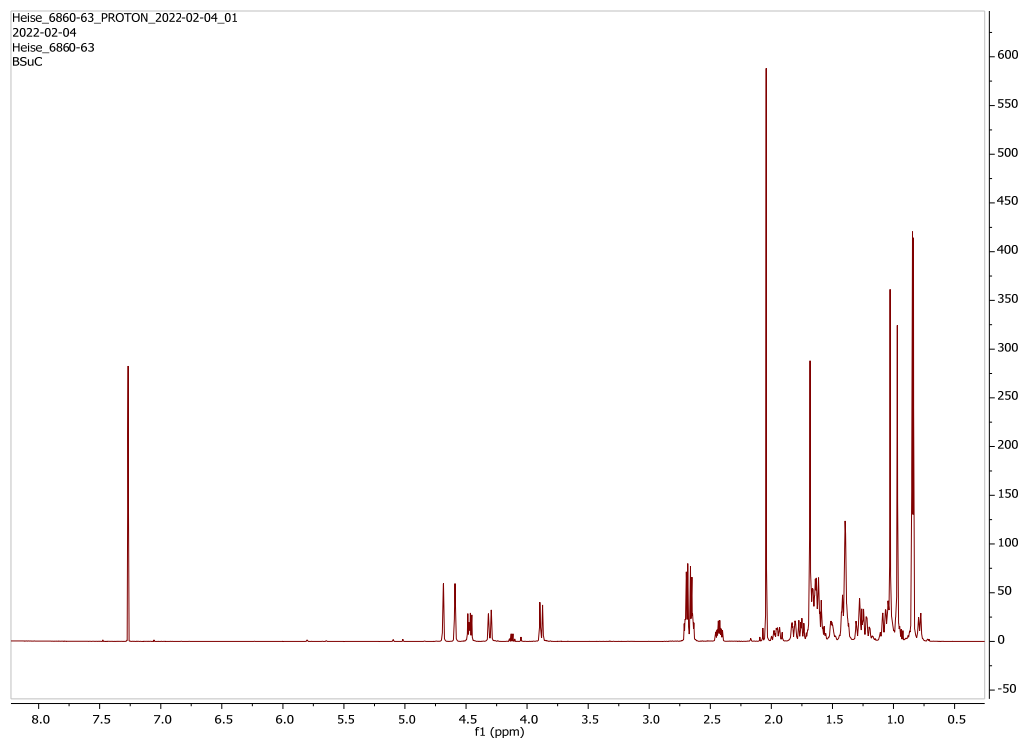

$^{13}\text{C}$  NMR ( $\text{CDCl}_3$ , 126 MHz)

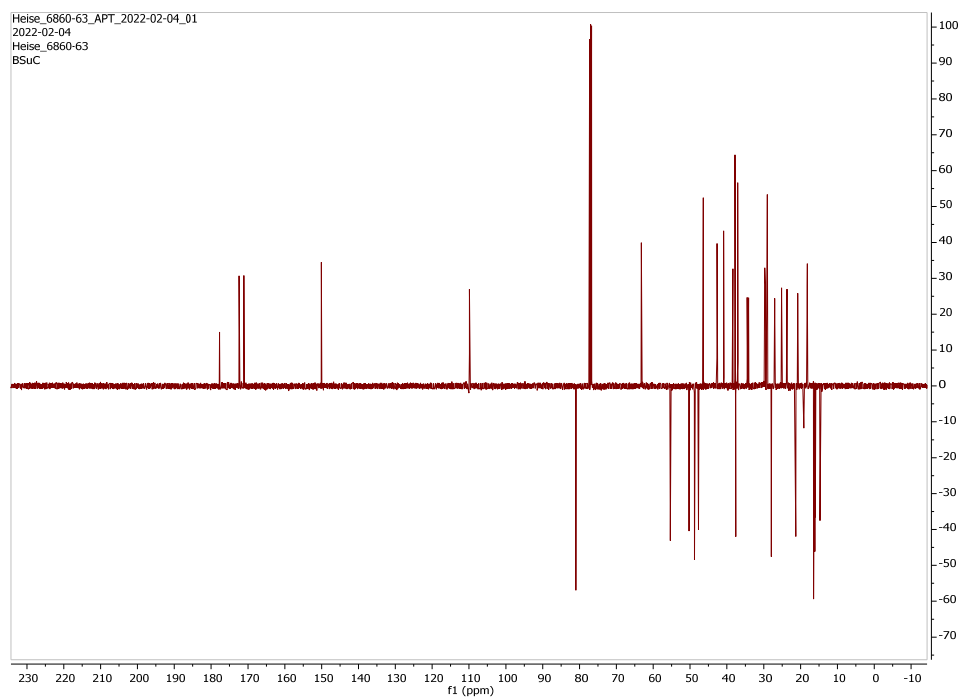

## ESI-MS

Spectrum RT 1:00 - 2:07 (138 scans) - Background Subtracted 0:02 - 0:48  
Heise-BSuc-2\_Scan1\_is1.datx 2022.02.08 13:05:36 ;  
ESI - Max: 3.5E7

Intensity

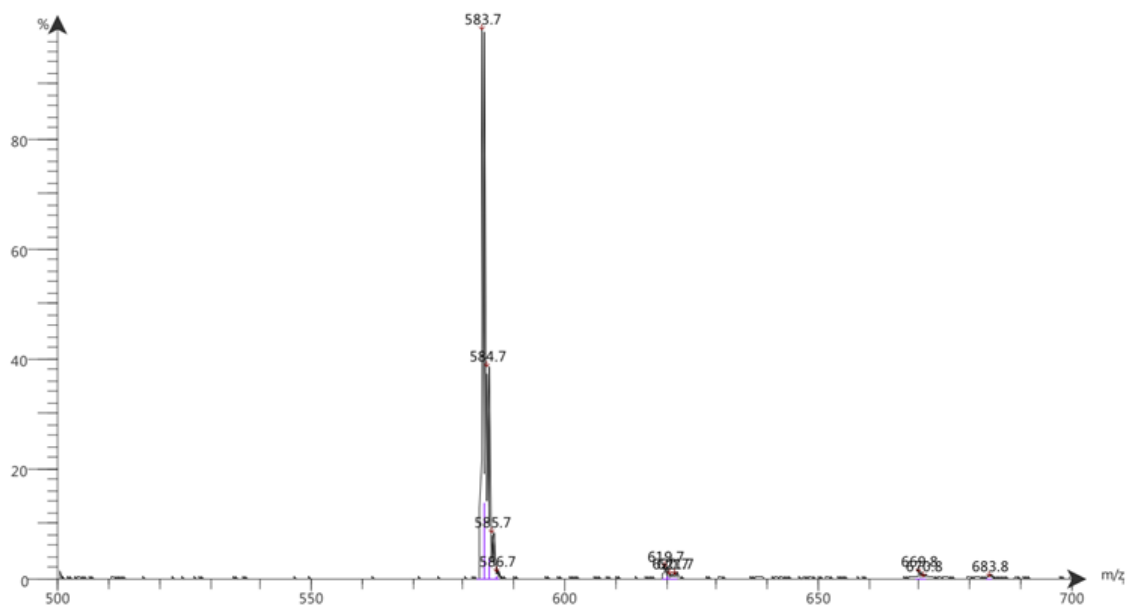

## Compound 5

$^1\text{H}$  NMR ( $\text{CDCl}_3$ , 500 MHz)

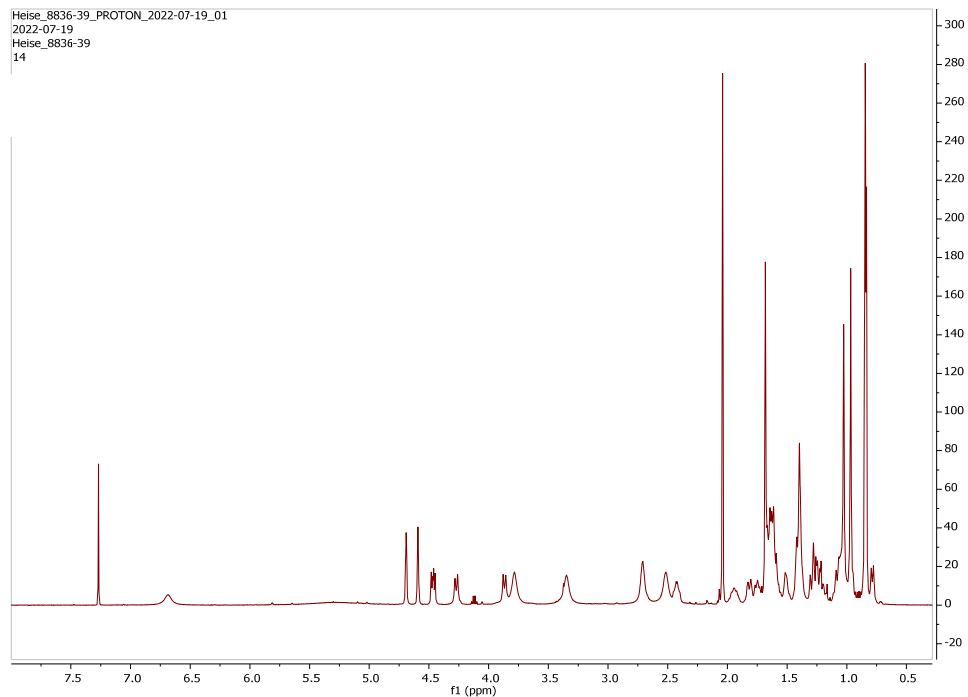

$^{13}\text{C}$  NMR ( $\text{CDCl}_3$ , 126 MHz)

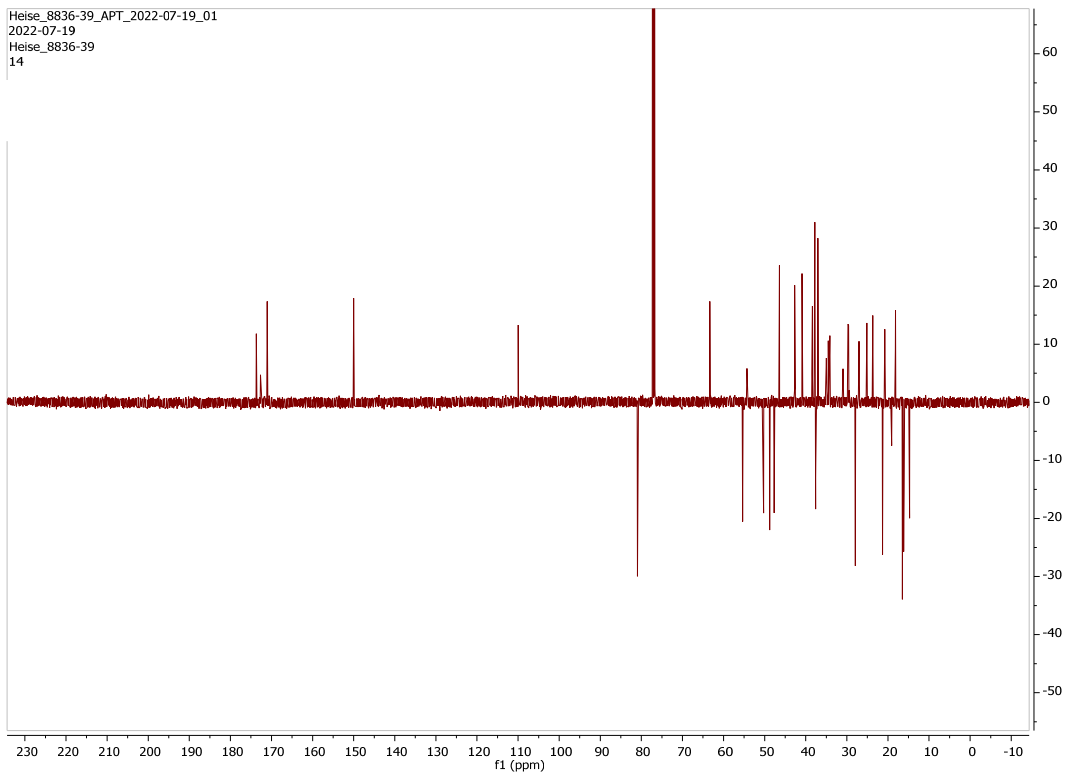

# ESI-MS

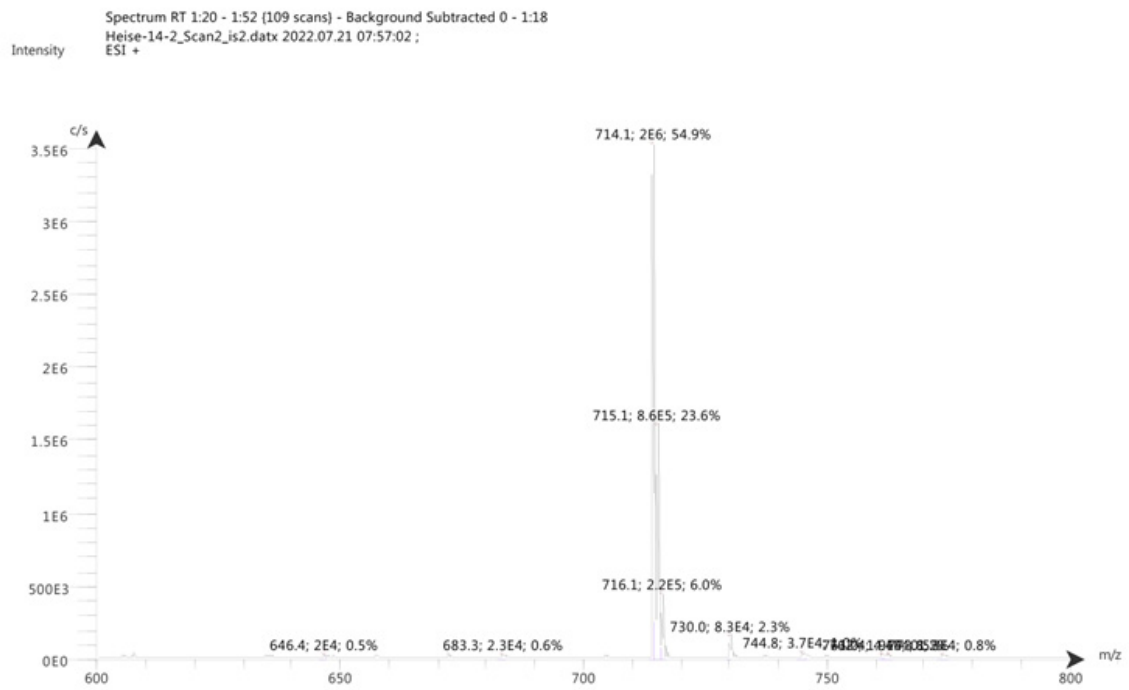

## Compound 6

$^1\text{H}$  NMR (DMSO- $d_6$ , 500 MHz)

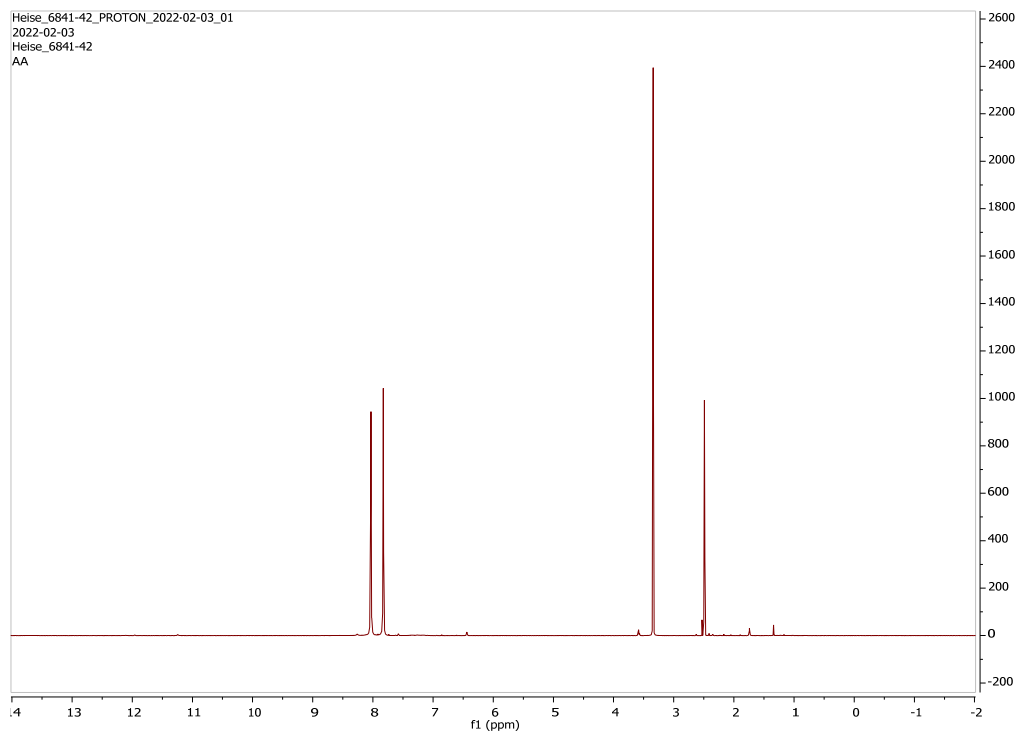

$^{13}\text{C}$  NMR (DMSO- $d_6$ , 126 MHz)

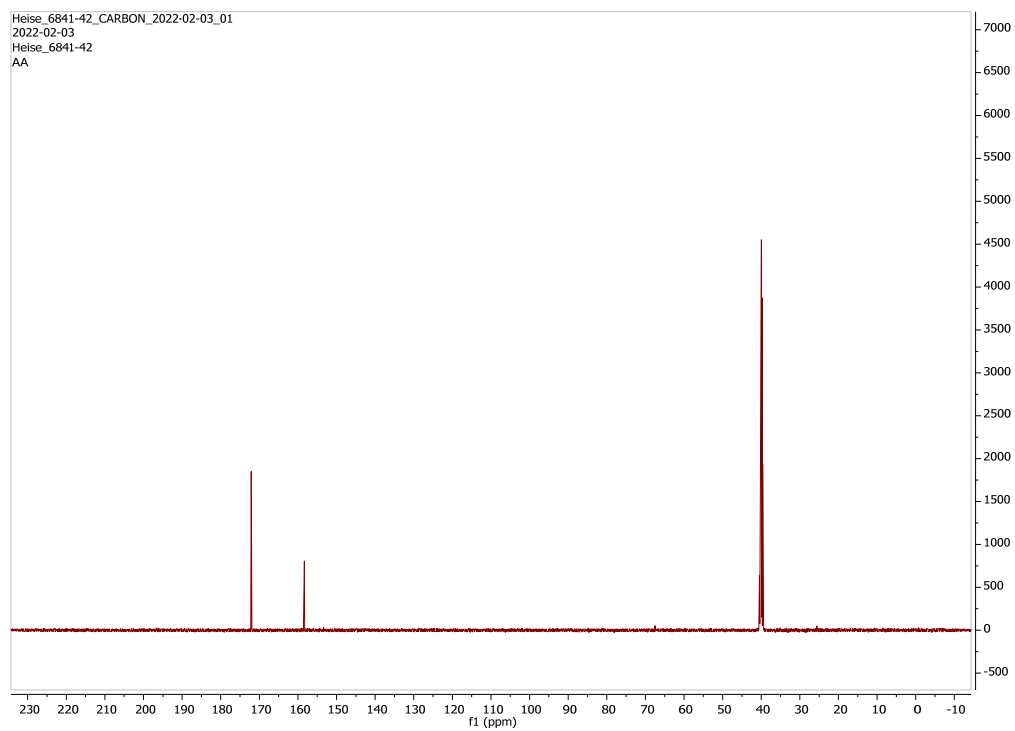

## ESI-MS

Spectrum RT 0:45 - 1:19 (70 scans) - Background Subtracted 0:06 - 0:34  
Heise-AA-2\_Scan1\_is1.datx 2022.02.08 12:36:23 ;  
ESI - Max: 5.1E6

Intensity

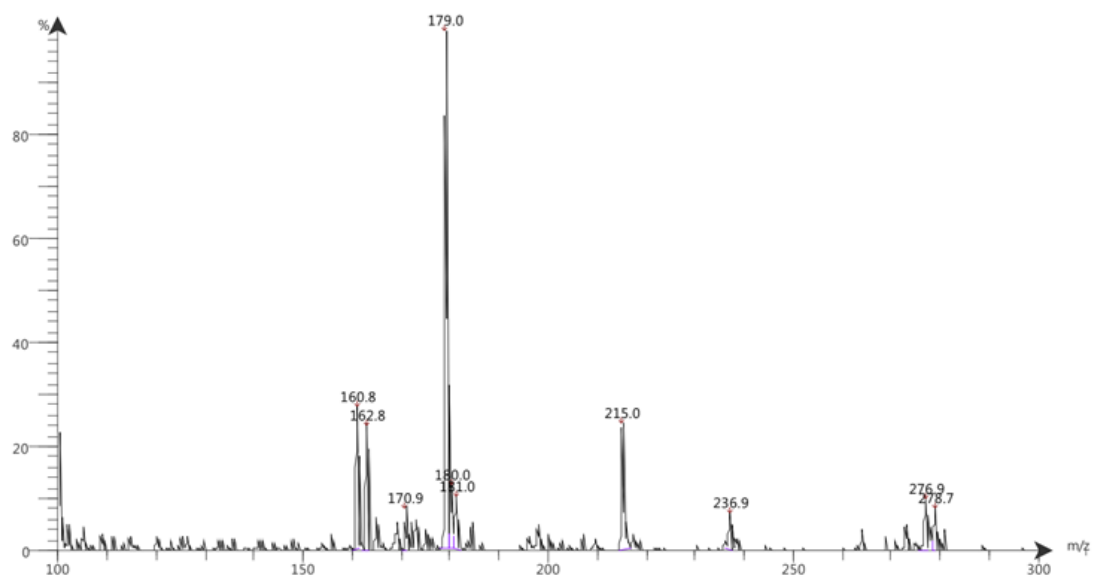



## Compound 9

$^1\text{H}$  NMR (DMSO- $d_6$ , 400 MHz)

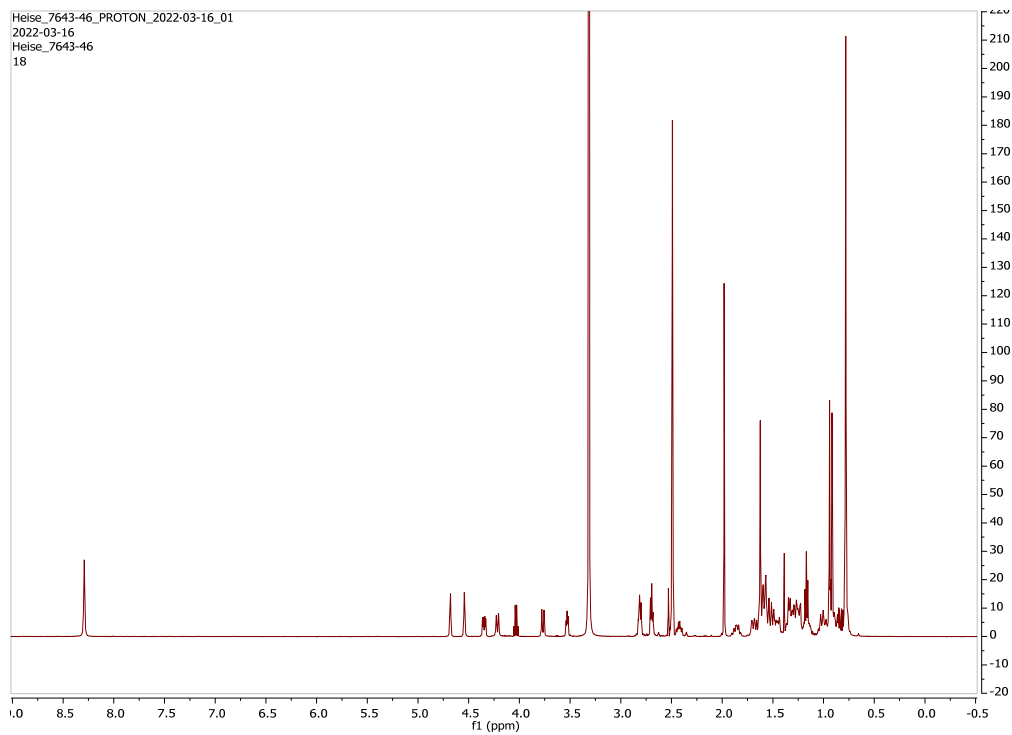

$^{13}\text{C}$  NMR (DMSO- $d_6$ , 101 MHz)

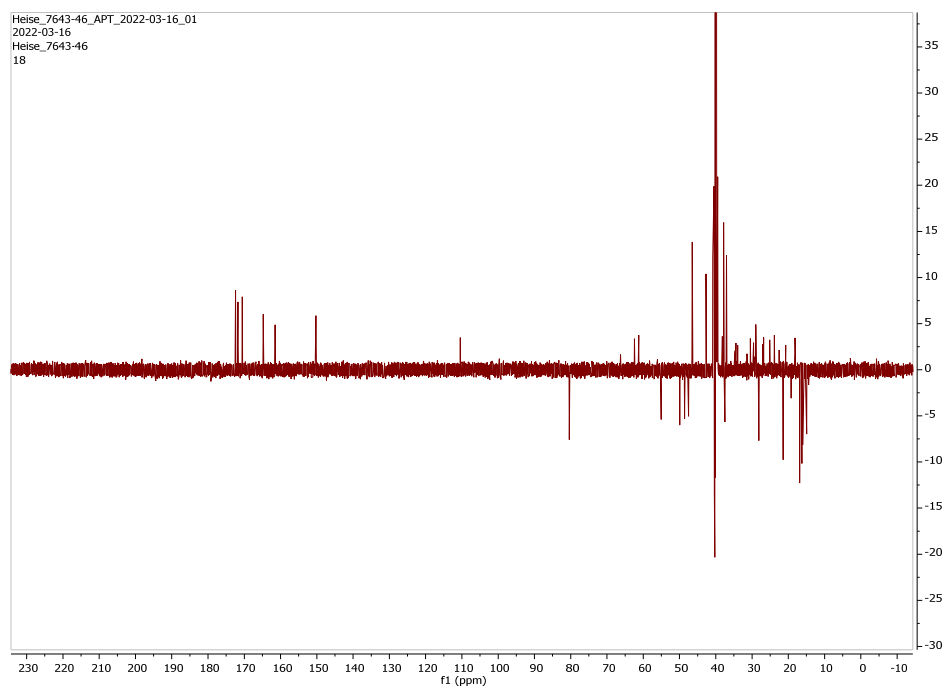

## ESI-MS

Spectrum RT 0:42 - 1:12 (61 scans) - Background Subtracted 0 - 0:37  
Heise\_BetAA-2\_Scan1\_is1.datx 2022.03.21 09:35:06 ;  
ESI -

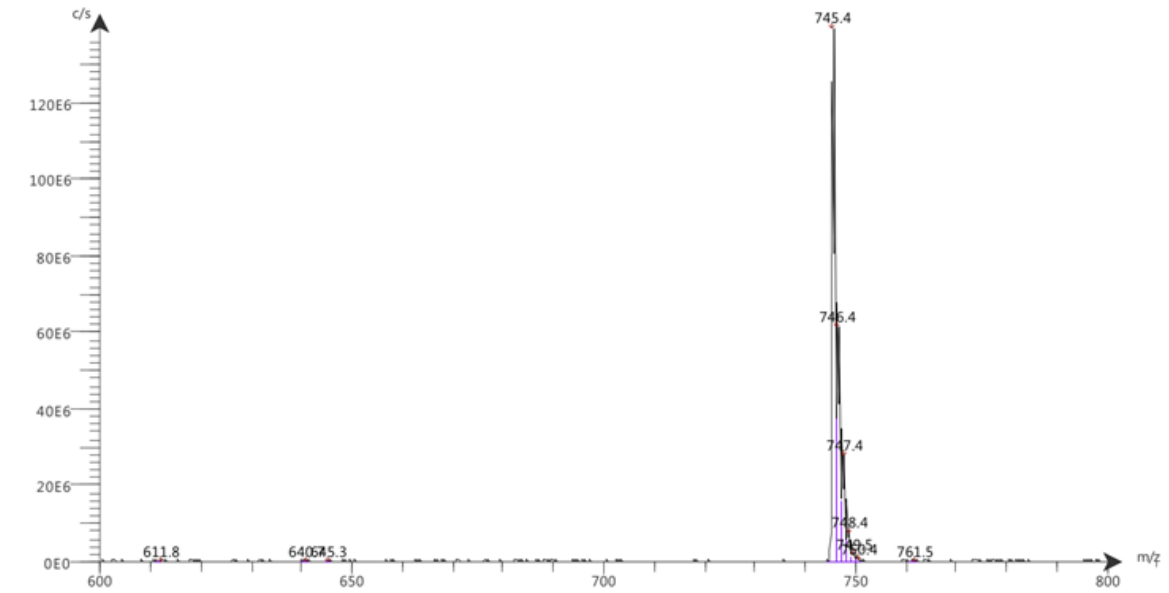

## Compound **10**

$^1\text{H}$  NMR ( $\text{CDCl}_3$ , 400 MHz)

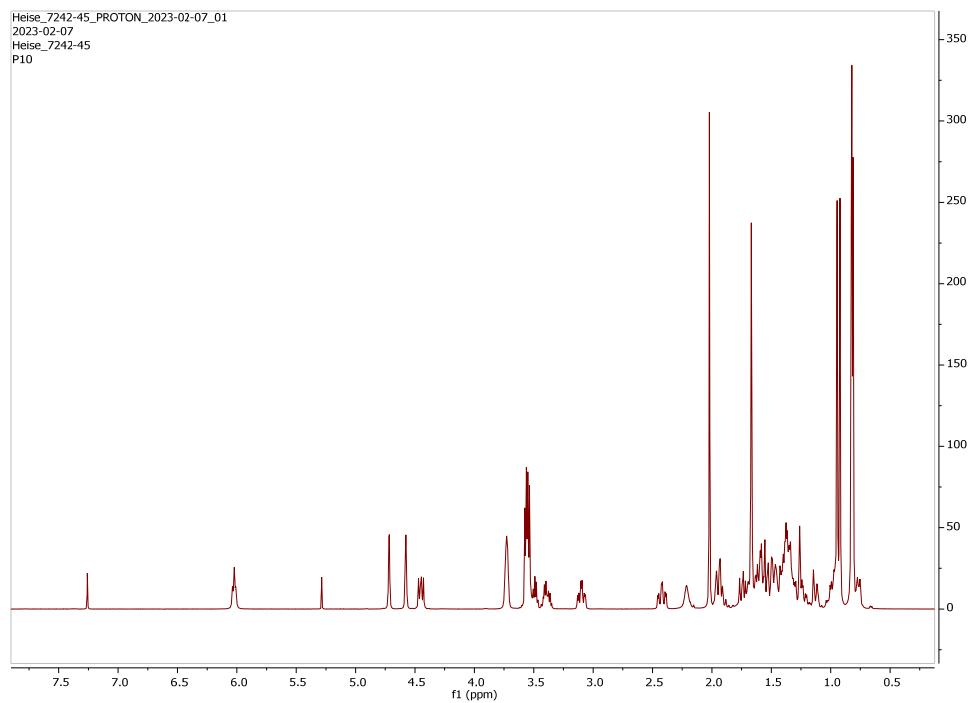

$^{13}\text{C}$  NMR ( $\text{CDCl}_3$ , 101 MHz)

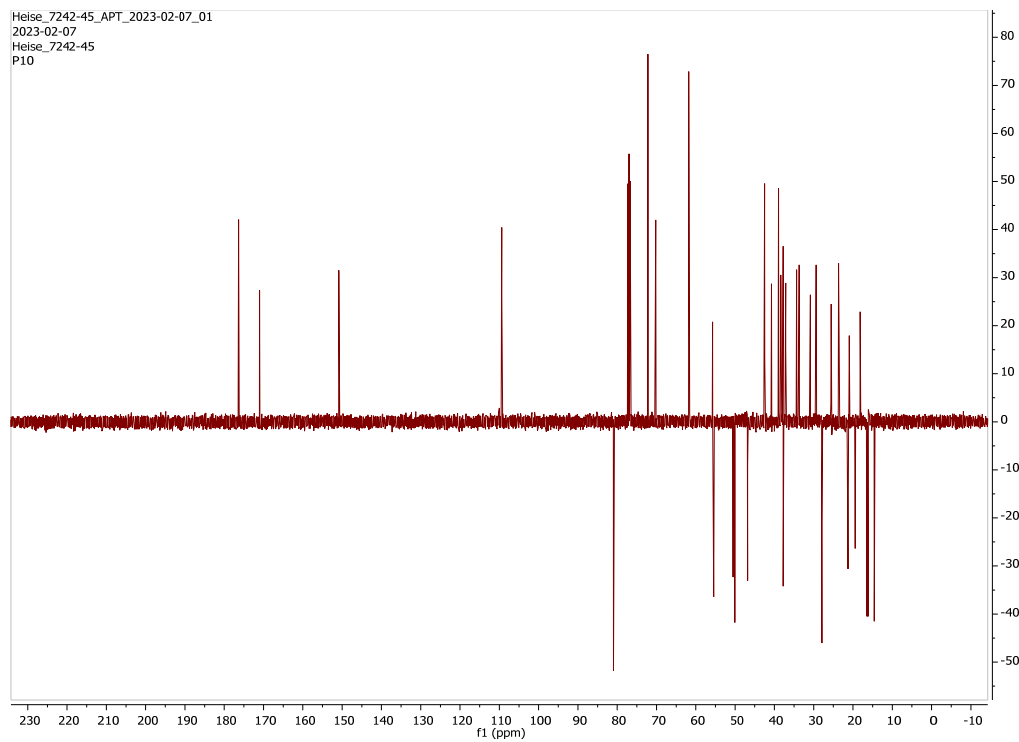

## Compound **11**

$^1\text{H}$  NMR ( $\text{CDCl}_3$ , 400 MHz)

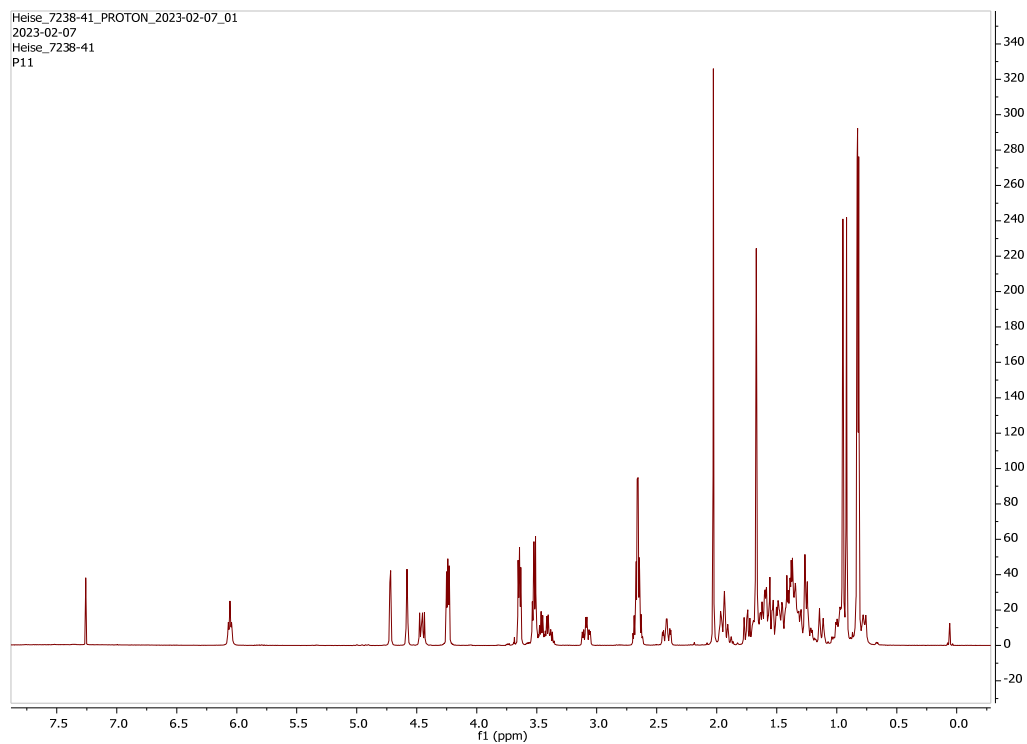

$^{13}\text{C}$  NMR ( $\text{CDCl}_3$ , 101 MHz)

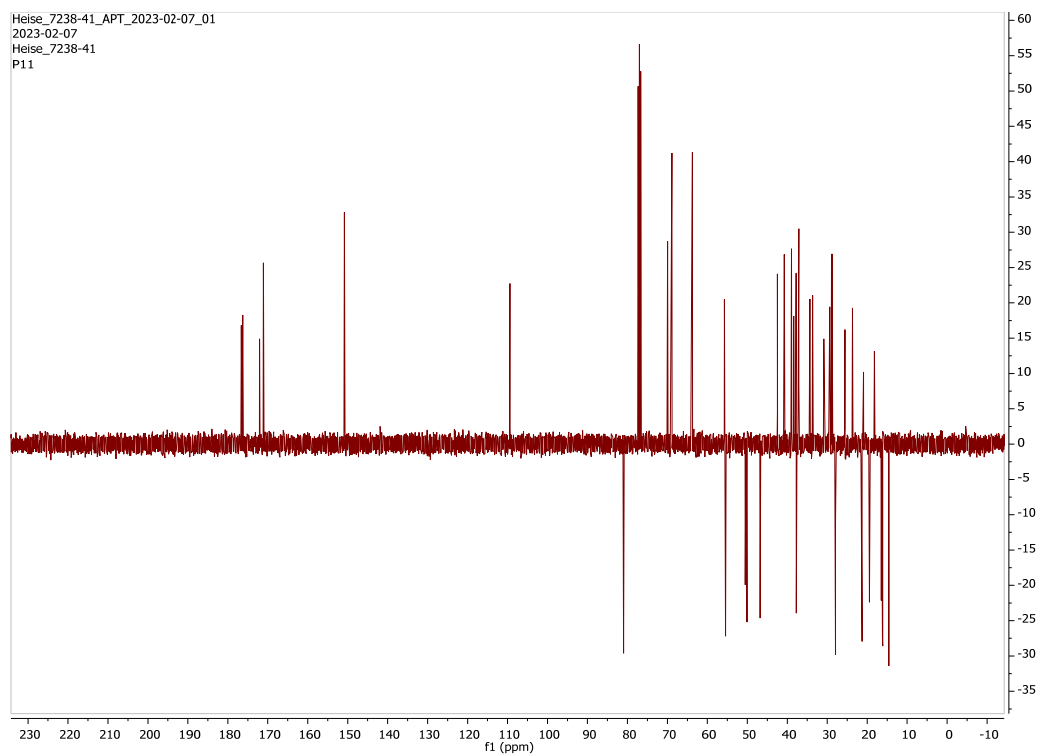

## Compound **12**

$^1\text{H}$  NMR ( $\text{CDCl}_3$ , 500 MHz)

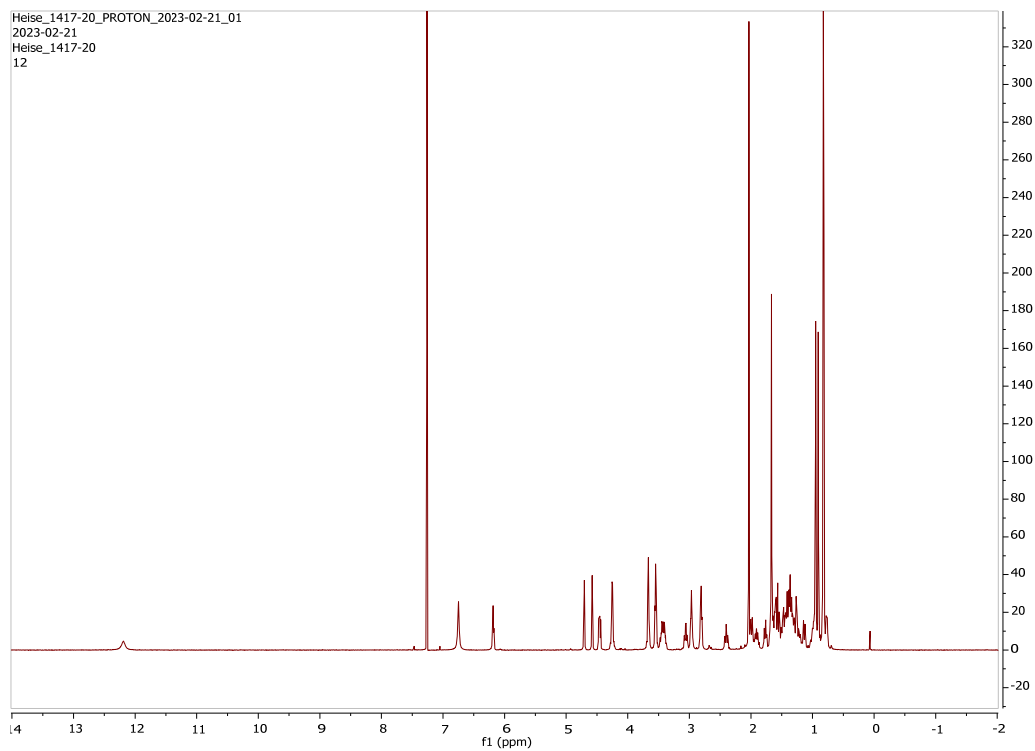

$^{13}\text{C}$  NMR ( $\text{CDCl}_3$ , 126 MHz)

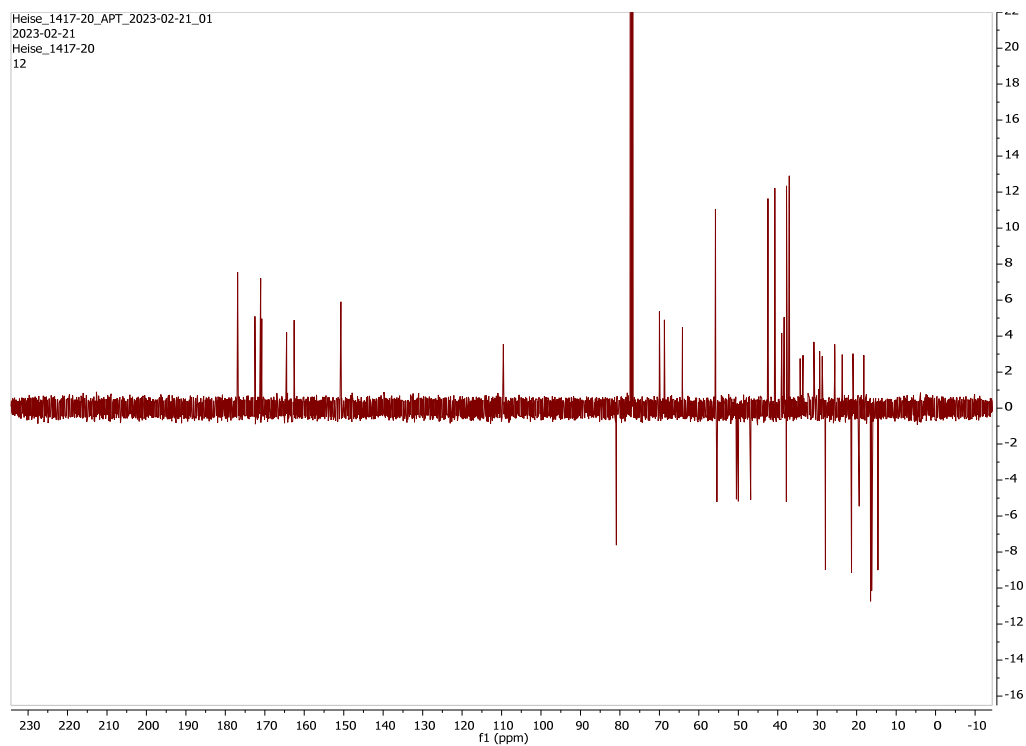

## ESI-MS

Spectrum RT 0:60 - 1:37 (83 scans) - Background Subtracted 0 - 0:57  
Heise-12-2\_Scan2\_is2.datx 2023.02.27 09:05:41 ;  
ESI - Max: 1.3E8

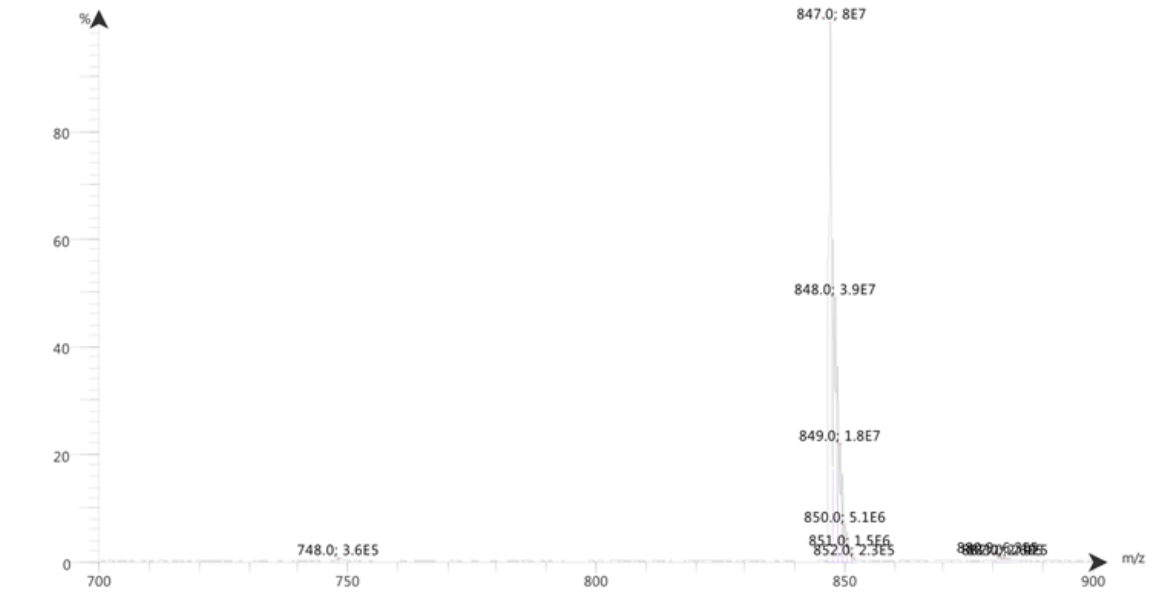

Supplement: s1 [file s1]
